# Supplementary material for: In situ assembly of bimetallic MOF composites on IF as efficient electrocatalysts for the oxygen evolution reaction
Source: Royal Society of Chemistry journal article supplement (doi:10.1039/d0dt04397d), 2021-01-01
Supplement: d0dt04397d1.pdf [file d0dt04397d1.pdf]

## Supporting Information

### **In Situ Assembly of Bimetallic MOF Composites on IF as Efficient Electrocatalysts for Oxygen Evolution Reaction**

Yeqing Zhang <sup>a</sup>, Jinlei Wang <sup>a</sup>, Lei Ye <sup>a</sup>, Meilin Zhang <sup>a</sup>, Yaqiong Gong <sup>a,b,\*</sup>

*a School of Chemical Engineering and Technology, North University of China, Taiyuan, Shanxi, China, 030051*

*b State Key Laboratory of Physical Chemistry of Solid Surfaces, Xiamen University, Xiamen, Fujian, China, .361005*

\* Email: [gyq@nuc.edu.cn](mailto:gyq@nuc.edu.cn) (Yaqiong Gong)

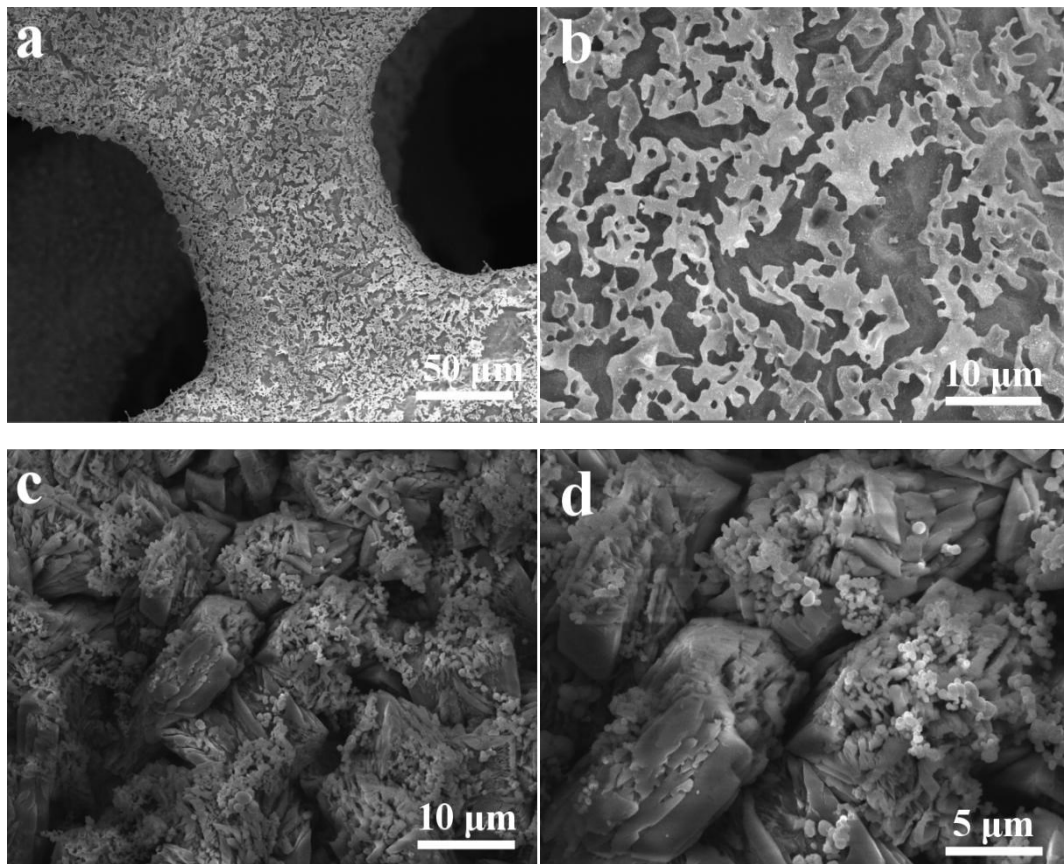

**Figure S1.** SEM images of (a, b) NiFe/IF, (c, d) Fe-MOF@IF.

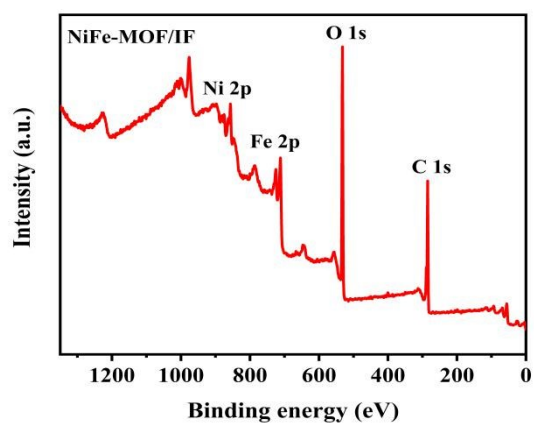

**Figure S2.** XPS survey spectra for the FeNi-MOF/IF.

**Figure S3.** Faradaic efficiency of NiFe-MOF/IF for the OER.

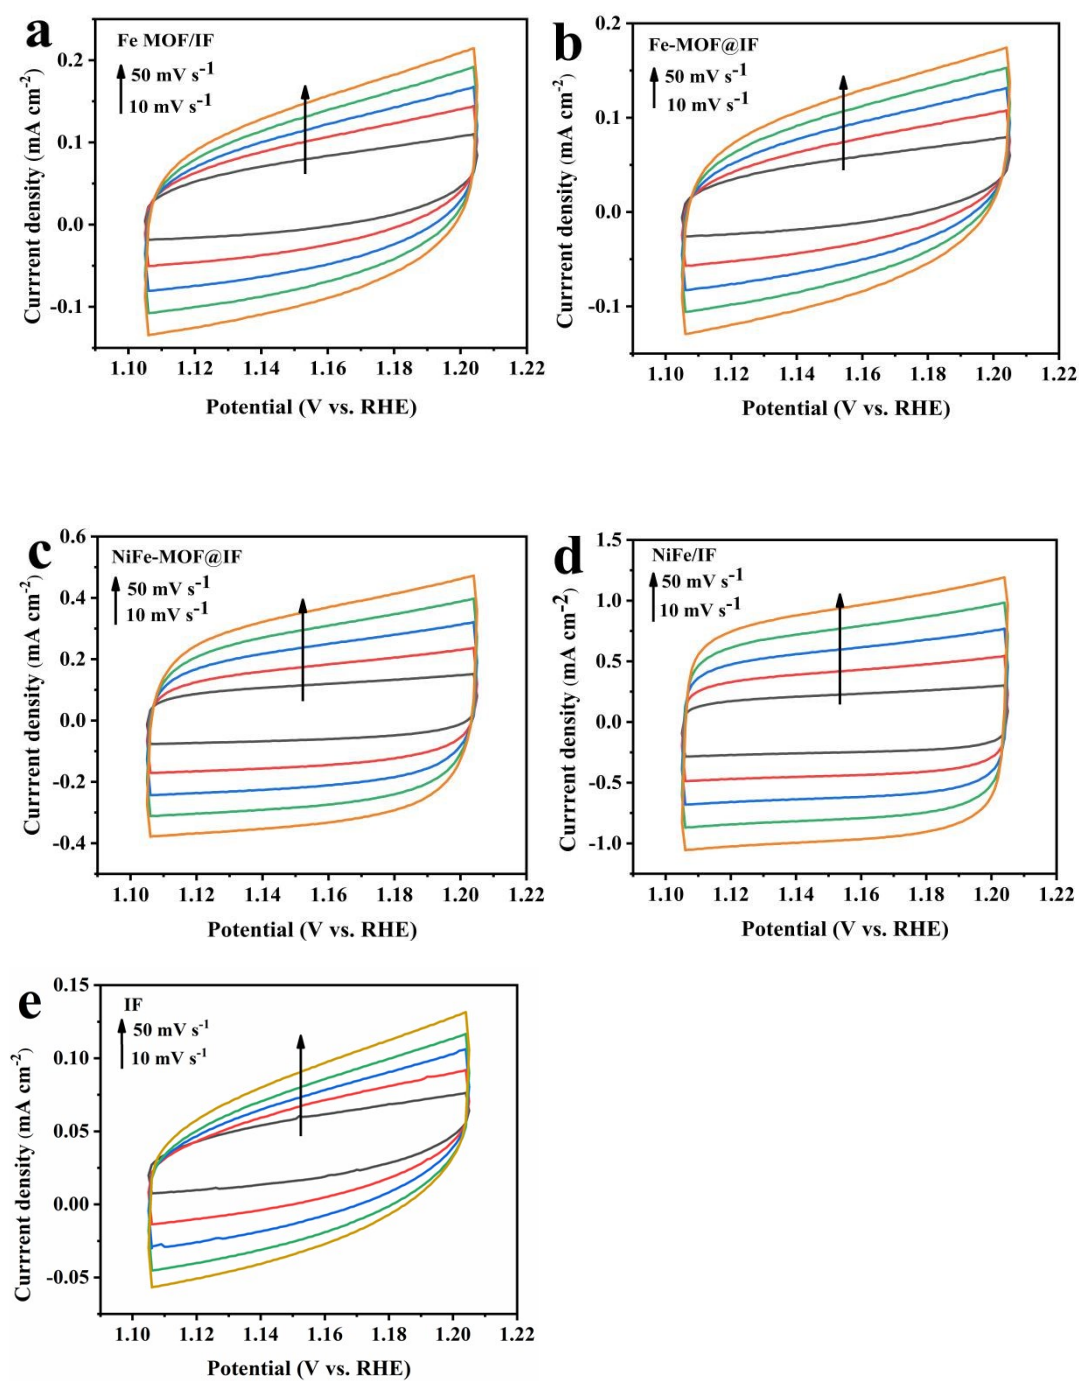

**Figure S4.** Cyclic voltammetry curves of (a) Fe-MOF/IF, (b) Fe-MOF@IF, (c) NiFe-MOF/IF, (d) NiFe/IF and (e) IF.

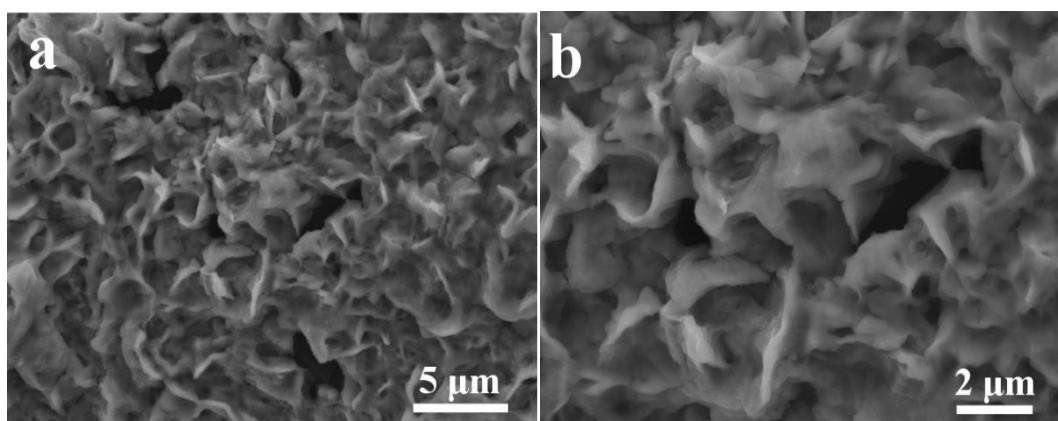

**Figure S5.** The SEM images of Fe-MOF/IF after OER.

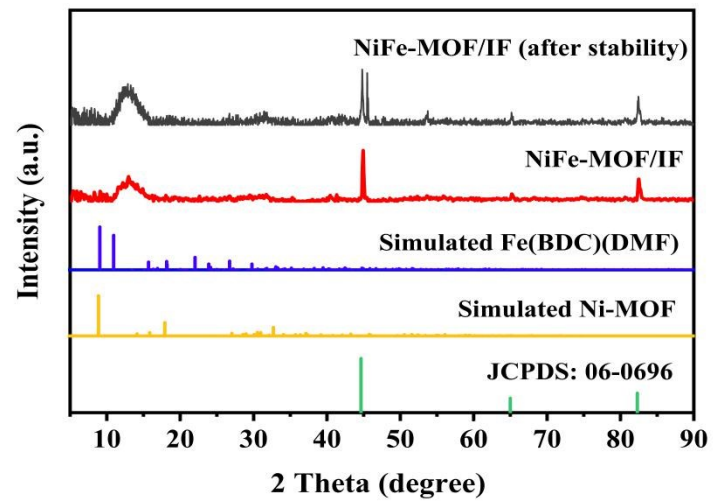

**Figure S6.** XRD pattern of NiFe-MOF/IF before and after stability.

**Table S1.** Comparison of OER activity between NiFe-MOF/IF and other recently reported non noble metal catalysts.

| <b>Catalyst</b>                      | <b>Current density<br/>(mA·cm<sup>-2</sup>)</b> | <b>Overpotential<br/>(mV)</b> | <b>Tafel slope<br/>(mV·dec<sup>-1</sup>)</b> | <b>Reference</b> |
|--------------------------------------|-------------------------------------------------|-------------------------------|----------------------------------------------|------------------|
| NiFe-MOF/IF                          | 10                                              | 230                           | 30.46                                        | this work        |
| NiFe-MOF-74/NF                       | 10                                              | 223                           | 71.6                                         | 1                |
| Fe <sub>1</sub> Ni <sub>2</sub> -BDC | 10                                              | 260                           | 35                                           | 2                |
| MIL-53(FeNi)/NF                      | 50                                              | 233                           | 31.3                                         | 3                |
| NiFe-MOF/OM-NFH                      | 10                                              | 270                           | 123                                          | 4                |
| Fe MOF/IF                            | 50                                              | 240                           | 72                                           | 5                |
| NiFe-MOF                             | 50                                              | 270                           | 49                                           | 6                |
| NiFe(dobpdc)                         | 10                                              | 207                           | 36                                           | 7                |
| NiFe-NFF                             | 10                                              | 227                           | 38.9                                         | 8                |
| NiFe-MS/MOF@NF                       | 50                                              | 230                           | 32                                           | 9                |
| NiFe-NCs                             | 10                                              | 271                           | 48                                           | 10               |



## Reference

- 1 J. Xing, K. Guo, Z. Zou, M. Cai, J. Du and C. Xu, *Chem. Commun.*, 2018, **54**, 7046-7049.
- 2 J. Li, W. Huang, M. Wang, S. Xi, J. Meng, K. Zhao, J. Jin, W. Xu, Z. Wang, X. Liu, Q. Chen, L. Xu, X. Liao, Y. Jiang, K. A. Owusu, B. Jiang, C. Chen, D. Fan, L. Zhou and L. Mai, *ACS Energy Lett.*, 2018, **4**, 285-292.
- 3 F. Sun, G. Wang, Y. Ding, C. Wang, B. Yuan and Y. Lin, *Adv. Energy Mater.*, 2018, **8**, 1800574.
- 4 A. Kumar and S. Bhattacharyya, *ACS Appl. Mater. Interfaces*, 2017, **9**, 41906-41915.
- 5 F. Zheng, D. Xiang, P. Li, Z. Zhang, C. Du, Z. Zhuang, X. Li and W. Chen, *ACS Sustainable Chem. Eng.*, 2019, **7**, 9743-9749.
- 6 L. Qi, Y.-Q. Su, Z. Xu, G. Zhang, K. Liu, M. Liu, E. J. M. Hensen and R. Y.-Y. Lin, *J. Mater. Chem. A*, 2020, **8**, 22974-22982.
- 7 C. Cao, D. D. Ma, Q. Xu, X. T. Wu and Q. L. Zhu, *Adv. Funct. Mater.*, 2018, **29**, 1807418.
- 8 X. Zhang, Q. Liu, X. Shi, A. M. Asiri and X. Sun, *Inorg. Chem. Front.*, 2018, **5**, 1405-1408.
- 9 M. Zhao, W. Li, J. Li, W. Hu and C. M. Li, *Adv Sci (Weinh)*, 2020, **7**, 2001965.
- 10 X. Li, D. D. Ma, C. Cao, R. Zou, Q. Xu, X. T. Wu and Q. L. Zhu, *Small*, 2019, **15**, e1902218.
